# Supplementary material for: p53 Specifically Binds Triplex DNA In Vitro and in Cells
Source: PLoS One. 2016 Dec 1;11(12):e0167439. doi: 10.1371/journal.pone.0167439 (PMC5131957; doi:10.1371/journal.pone.0167439)
Supplement: S3 Table — In-silico candidate gene screening of publicly available microarray and sequencing datasets and summarization of results of verification by RT-qPCR. See S1 File for experimental details. (XLSX) [file pone.0167439.s010.xlsx]

## Sheet: p53 target genes
S3 Table		Verification of candidate p53 target genes
		In-silico candidate gene screening of publicly available microarray and sequencing datasets and summarization of results of verification by RT-qPCR.
		RNA-seq		microarray(Affymetrix, Agilent)										Brazdova
		SRP043273	SRP022871	E-GEOD-30753	E-GEOD-50650		Allen	E-GEOD-8660		E-MEXP-2556	(p53S389A)			RT-qPCR
		Sánchez et all 2014	Janky R et all 2014	Kracikova et all, 2013	Bisio et all 2013		Allen et all 2014	Sauer et all NAR 2008		Kudoh et all Exp Cell Res 2010
		HCT116,5FU	MCF7,nutlin	DOX	MCF7,DOX	MCF7,nutlin	HCT116	H1299-p53	H1299-delta-p53 (1-363)	H1299-p53WT	H1299-p53SA			H1299-p53	MCF7,NUT	MCF7,AD	MCF7sip53
				transcrip. profiling by array	transcription profiling by array			transcription profiling by array		transcription profiling by array				Fig.7a	Fig.7b	Fig76b	Fig.7a
	TP53	0.642702	0.702673	4.11855	0.871232	1.0371	down	0.806057	0.840872	NA	NA			330			0.09
	MDM2	3.3603	9.82607	1.49496	3.69153	10.4063	6.00716	1.76102	2.32556	5.09562	2.72183			NA	NA	NA	NA
	BAX	3.52321	3.2486	1.51163	2.99228	5.38701	2.5072	0.927999	0.984958	5.65857	1.84691			1.48	3.32	1.99	NA
p53-related	TIGAR/C12orf5	3.5743	4.44536	NA	NA	NA	3.17304	NA	NA	1.97958	1.88528			NA	NA	NA	NA
	GADD45A	3.73603	7.11696	1.54043	2.40697	3.23938	up	1.08043	1.28757	1.5234	1.93617			NA	NA	NA	NA
	CDKN1A	6.67579	24.2247	2.783	6.69697	10.0774	7.44548	4.39129	2.16675	10.3481	9.89886			1.35	19.33	6.8	0.2
	GAPDH	1	1	NA	1	1	NA	1	1	NA	NA			1	1	1	1
	ACTB	1.64617	1.07588	NA	0.875341	0.736594	NA	0.753468	1.07763	NA	NA			NA	NA	NA	NA
housekeeping	LDHA	0.966595	0.840365	NA	0.900669	1.45263	NA	0.986655	0.928862	NA	NA			NA	NA	NA	NA
	NONO	0.773476	0.888669	0.763923	0.889777	1.29536	NA	0.951137	0.941225	NA	NA			NA	NA	NA	NA
	PGK1	1.00394	0.964649	NA	1.00136	1.09277	NA	1.02393	0.947377	NA	NA			NA	NA	NA	NA
	PPIH	0.988952	0.41319	0.374895	0.634086	0.767233	NA	0.849101	0.999524	NA	NA			NA	NA	NA	NA
				NA
	ABCG5	1.4625	NA	NA	0.898379	1.27838	NA	1.98599	0.711114	1.17652	NA	NA		2.06	3.97	2.15	0.54
	BMS1	0.725965	0.707118	NA	1.09438	1.67804	NA	1.35945	0.942996	NA	NA			NA	NA	NA	NA
	DDX54	0.898056	0.755685	0.766989	0.896047	1.5122	NA	2.28749	1.49289	NA	0.715594			NA	NA	NA	NA
	INSR	0.748783	1.24166	NA	0.873359	1.05131	up	2.54933	2.80001	1.4121	1.57232			4.07	2.06	0.92	0.48
	MAK16	1.45973	0.710241	0.580363	0.416707	0.608923	NA	0.782389	0.656182	NA	NA
	MAPK9	0.762655	0.570934	NA	0.883744	0.988858	NA	0.881761	0.896759	NA	NA			1.59	0.72	0.73	1.14
	MCC	0.9012	5.11222	2.3347	1.18547	1.49278	up	1.35992	1.14356	1.16572	1.86503			1.59	2.53	1	0.6
TAT-triplex (p53-net)	MCCC1	0.495213	1.19965	NA	1.33087	1.96022	NA	1.13509	0.923666	0.766583	0.771898			NA	NA	NA	NA
	MIB1	0.403611	1.11125	NA	1.08087	1.57103	NA	NA	NA	NA	NA			NA	NA	NA	NA
	NAT10	0.875763	0.663862	0.799304	0.470711	0.893712	NA	1.10442	0.931462	NA	NA			2.01	0.98	0.78	0.74
	NFAT5	0.721619	1.50718	1.58208	1.30877	1.85233	NA	1.0481	1.12509	NA	2.5022			1.79	1.67	1.6	0.7
	PEX12	2.09541	1.31175	NA	0.524266	0.970754	NA	1.29684	0.964418	0.825	NA			NA	NA	NA	NA
	PIK3R4	0.7015	0.840112	NA	1.08581	1.35138	NA	0.807411	0.726323	1.58138	1.54869			NA	NA	NA	NA
	PSMB2	1.41256	0.724962	NA	0.901337	1.29738	NA	0.995678	0.909427	NA	NA			NA	NA	NA	NA
	STAG2	0.617375	1.04916	0.73486	0.894972	1.63501	NA	1.13558	1.13117	0.76527	NA			1.66	NA	NA	NA
	TGIF1	0.868199	2.00259	NA	0.647733	1.12293	NA	0.969919	1.08785	NA	0.777284			NA	NA	NA	NA
	ACY1	1.15979	1.0798	NA	0.703767	1.19797	NA	NA	NA	NA	NA			NA	NA	NA	NA
	AP2B1	0.695085	1.31026	NA	0.964476	1.25267	NA	1.61527	1.1864	NA	NA			NA	NA	NA	NA
	ARHGEF3	1.15787	1.21369	1.93528	1.0863	1.74707	NA	0.96729	0.61778	NA	NA			NA	NA	NA	NA
	ATP13A1	0.970832	1.01883	NA	1.49559	1.29058	NA	0.997558	0.659364	NA	1.58031			NA	NA	NA	NA
	BMPR1B	NA	0.942634	NA	0.580561	1.0017	NA	0.264799	0.870522	NA	NA			NA	NA	NA	NA
	CRB3	0.841397	1.69319	NA	0.857261	1.55564	NA	NA	NA	NA	NA			NA	NA	NA	NA
	ENOX1	0.912813	1.74201	NA	0.8338	1.16429	NA	2.25156	1.24693	NA	NA			1.33	1.69	0.66	0.6
	FAIM3	1.89584	1.90299	NA	1.15779	1.36474	NA	NA	NA	NA	NA			NA	NA	NA	NA
	FAM212B	2.15431	3.60211	NA	NA	NA	3.526	NA	NA	NA	NA			NA	NA	NA	NA
	GDPD1	0.593317	2.10315	NA	0.801854	1.18795	NA	NA	NA	NA	NA			NA	NA	NA	NA
	GSTO2	0.652806	1.02852	NA	0.548447	0.8729	NA	NA	NA	NA	NA			NA	NA	NA	NA
	GUCA1C	NA	NA	NA	0.913136	1.33446	NA	NA	NA	NA	NA			NA	NA	NA	NA
	KIAA1377/CEP126	0.55224	1.01763	NA	NA	NA	NA	NA	NA	NA	NA			NA	NA	NA	NA
	LAPTM4B	1.19217	0.911454	NA	0.848916	0.890784	NA	1.16442	0.907445	NA	NA			NA	NA	NA	NA
TAT-triplex (isolated)	LTC4S	NA	NA	NA	0.614342	1.04936	NA	2.56089	4.16812	NA	NA			NA	NA	NA	NA
	MICB	1.36857	2.55823	0.583121	2.83208	4.25509	NA	0.869206	0.632931	NA	-0.917592			NA	NA	NA	NA
	NKX2-5	NA	NA	NA	0.984569	1.43546	NA	1.54466	3.441	1.56702	NA			NA	NA	NA	NA
	NMB	1.13655	1.02647	NA	1.51819	1.13159	NA	1.21941	0.996152	1.17027	NA			NA	NA	NA	NA
	PF4	NA	NA	NA	0.934044	1.23572	NA	6.19162	0.842879	NA	NA			NA	NA	NA	NA
	PNMAL2	NA	NA	NA	0.929447	1.32507	NA	NA	NA	NA	NA			NA	NA	NA	NA
	SCAF4	1.57474	0.724474	NA	0.89085	1.11709	NA	1.36339	1.34316	NA	1.58862			NA	NA	NA	NA
	SLC22A16	NA	NA	NA	1.04863	1.45505	NA	NA	NA	NA	NA			NA	NA	NA	NA
	SLC25A23	0.577023	1.00767	NA	1.06469	1.22279	NA	1.14781	0.765595	NA	NA			NA	NA	NA	NA
	THAP7	1.18232	0.673875	NA	0.498023	0.60828	NA	0.78249	0.719593	NA	NA			NA	NA	NA	NA
	UBASH3A	NA	NA	NA	0.929459	1.32194	NA	0.567426	2.02498	NA	NA			NA	NA	NA	NA
	ZNF773	NA	1.15608	NA	0.959065	1.38116	NA	NA	NA	NA	NA			NA	NA	NA	NA
	ZNF80	0.984846	NA	NA	0.864099	1.20447	NA	0.0802421	1.0365	NA	NA			NA	NA	NA	NA
